# Supplementary material for: A novel “turn-on” fluorescent probe based on naphthalimide for the tracking of lysosomal Cu2+ in living cells
Source: Royal Society of Chemistry journal article supplement (doi:10.1039/d0nj04416d), 2020-01-01
Supplement: d0nj04416d1.pdf [file d0nj04416d1.pdf]

## Supporting

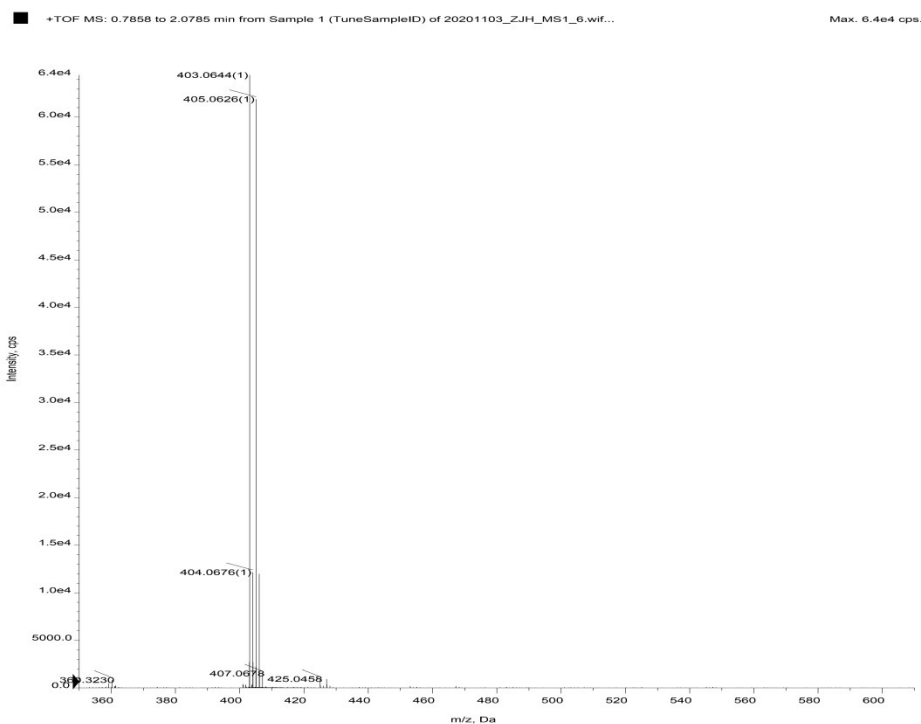

Fig. S1. TOF Mass spectrum of Compound 1.

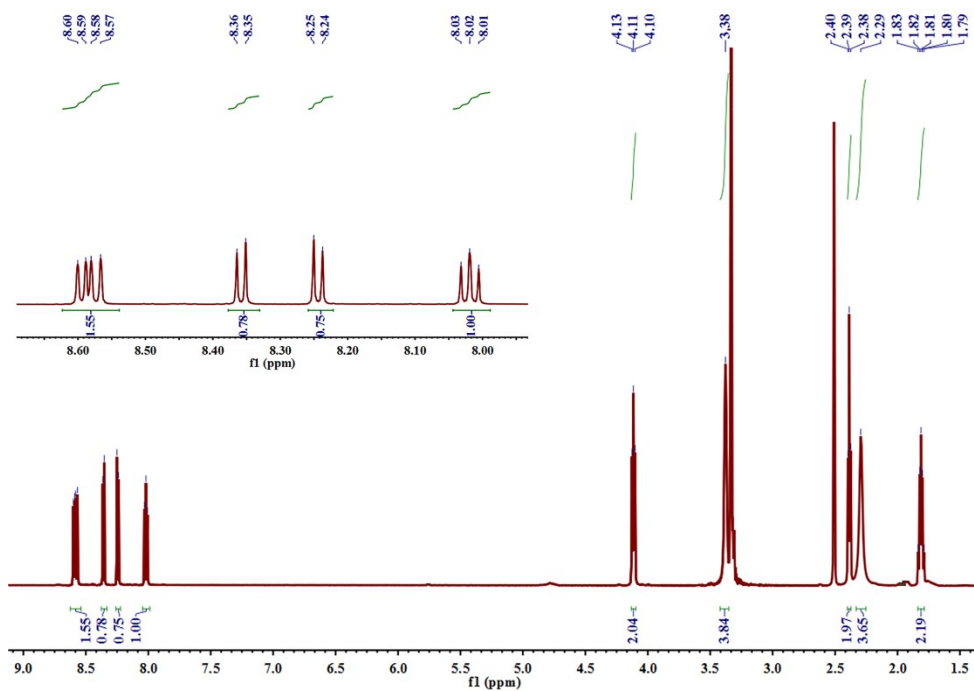

Fig. S2.  $^1\text{H}$  NMR spectrum of Compound 1 ( $\text{DMSO}-d_6$ ).

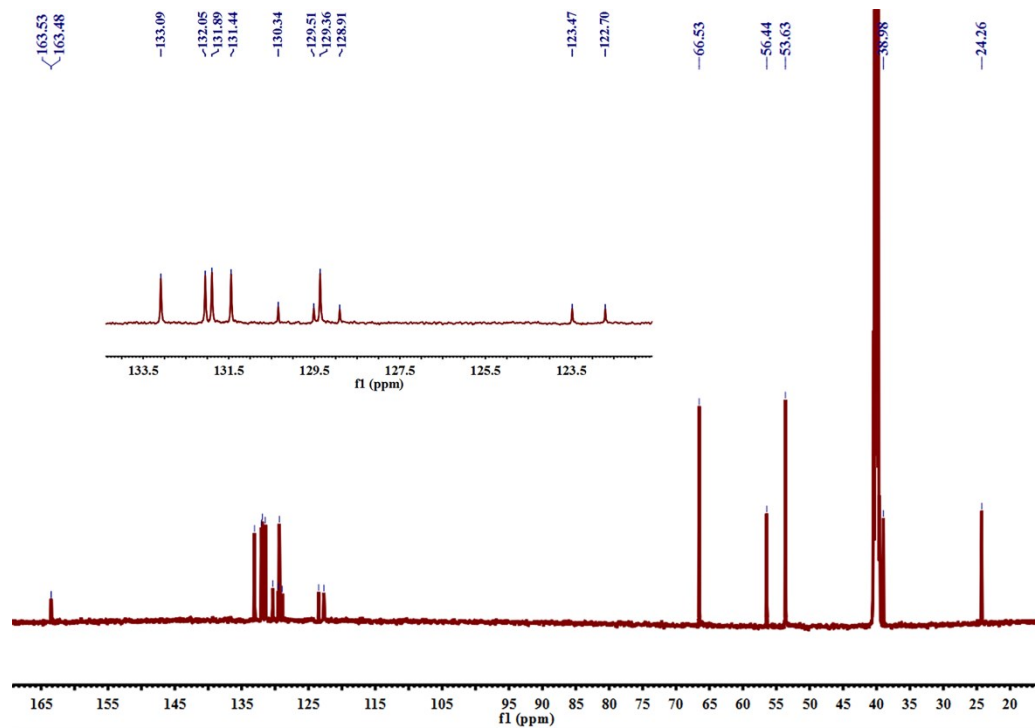

**Fig. S3.**  $^{13}\text{C}$  NMR spectrum of Compound 1(DMSO- $d_6$ ).

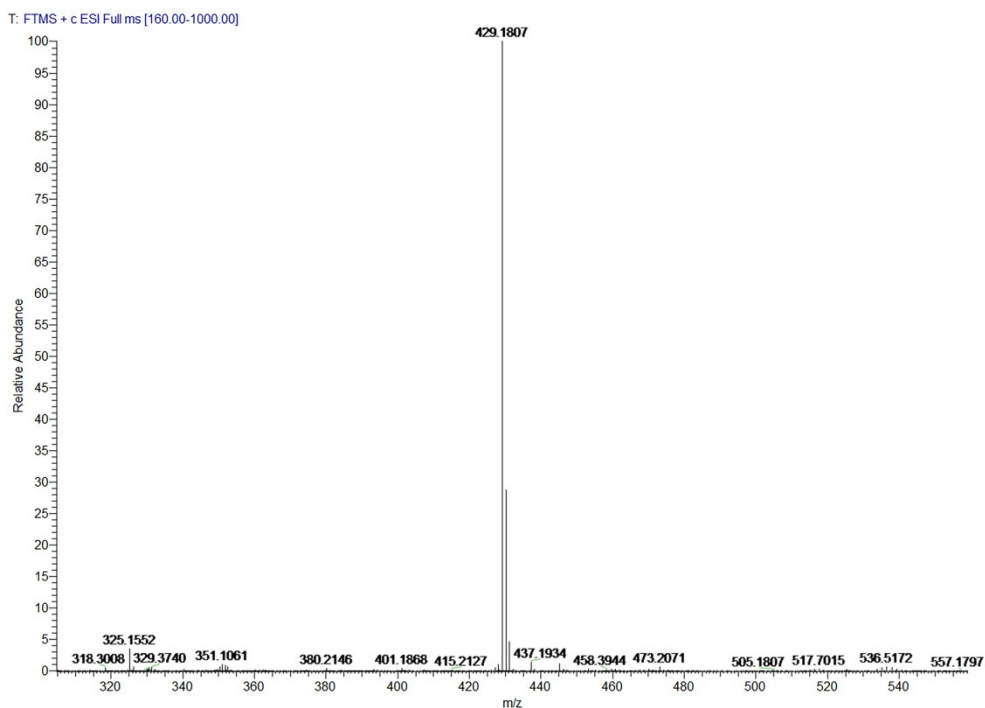

**Fig. S4.** FTMS spectrum of MFNI

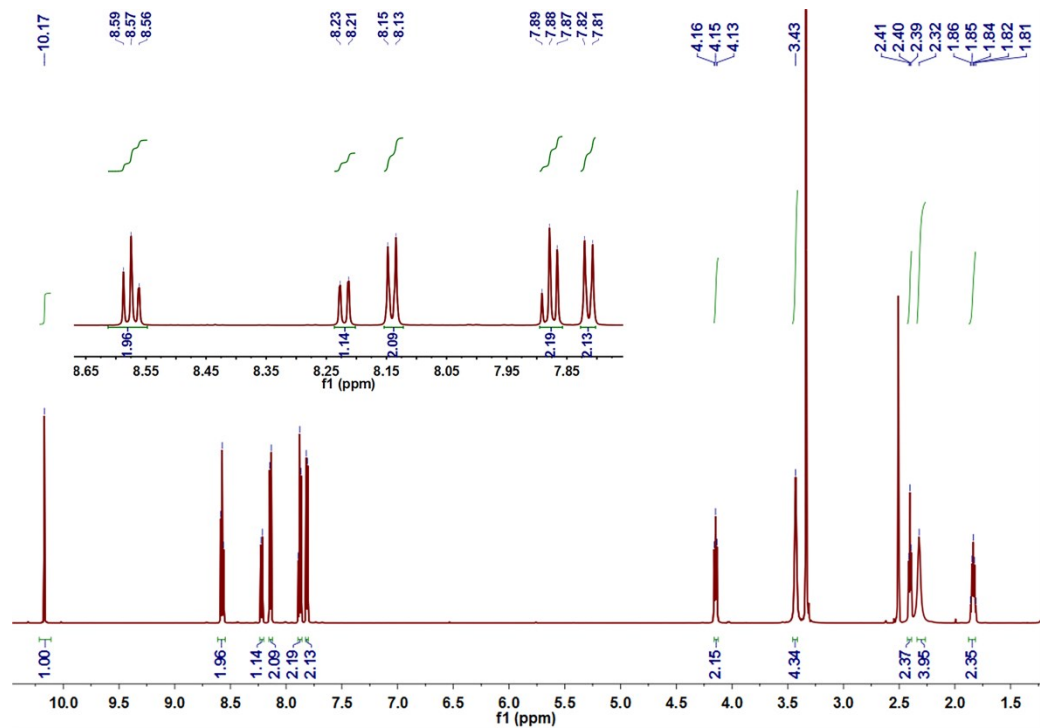

Fig. S5.  $^1\text{H}$  NMR spectrum of MFNI ( $\text{DMSO}-d_6$ ).

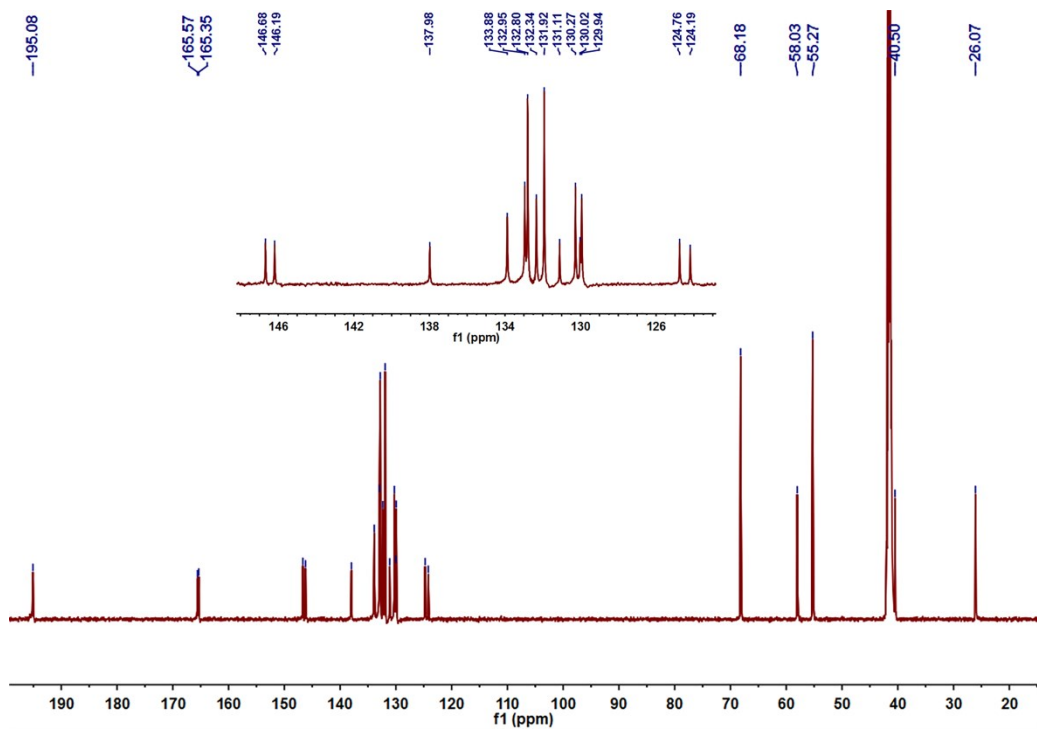

Fig. S6.  $^{13}\text{C}$  NMR spectrum of MFNI ( $\text{DMSO}-d_6$ ).

F1 #9 RT: 0.12 AV: 1 NL: 7.31E8  
T: FTMS + c ESI Full ms [100.00-1000.00]

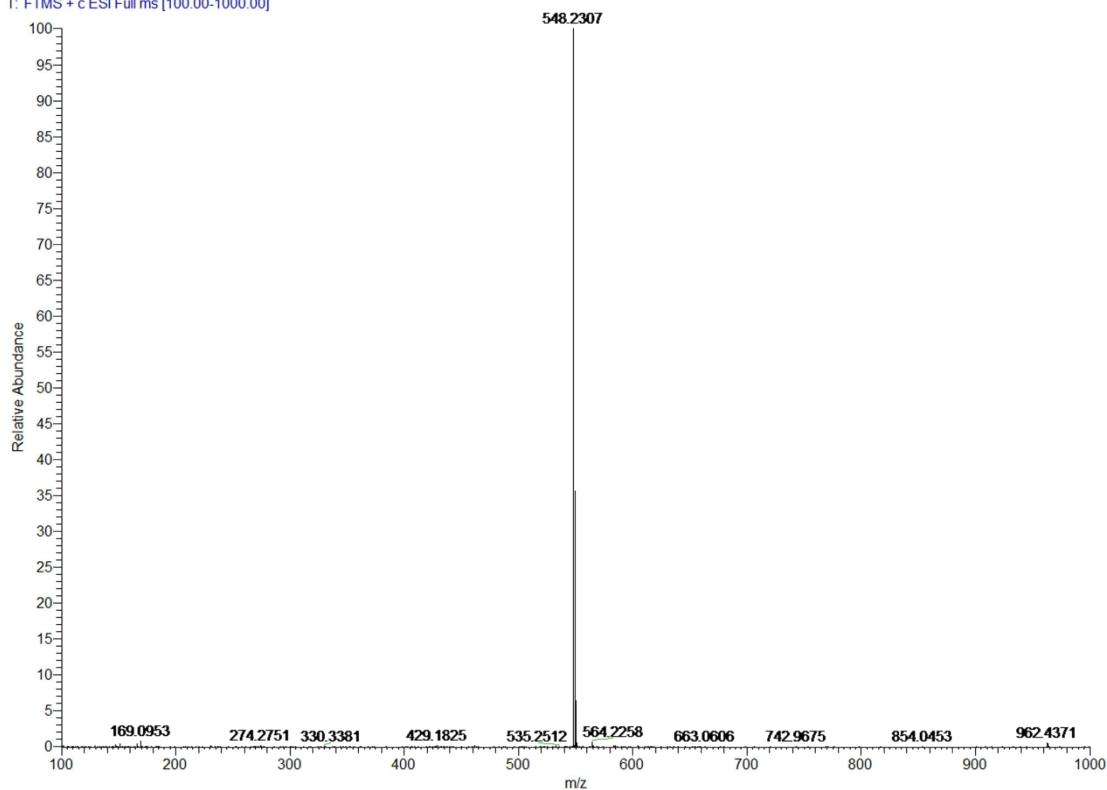

Fig. S7. FTMS spectrum of CuNI.

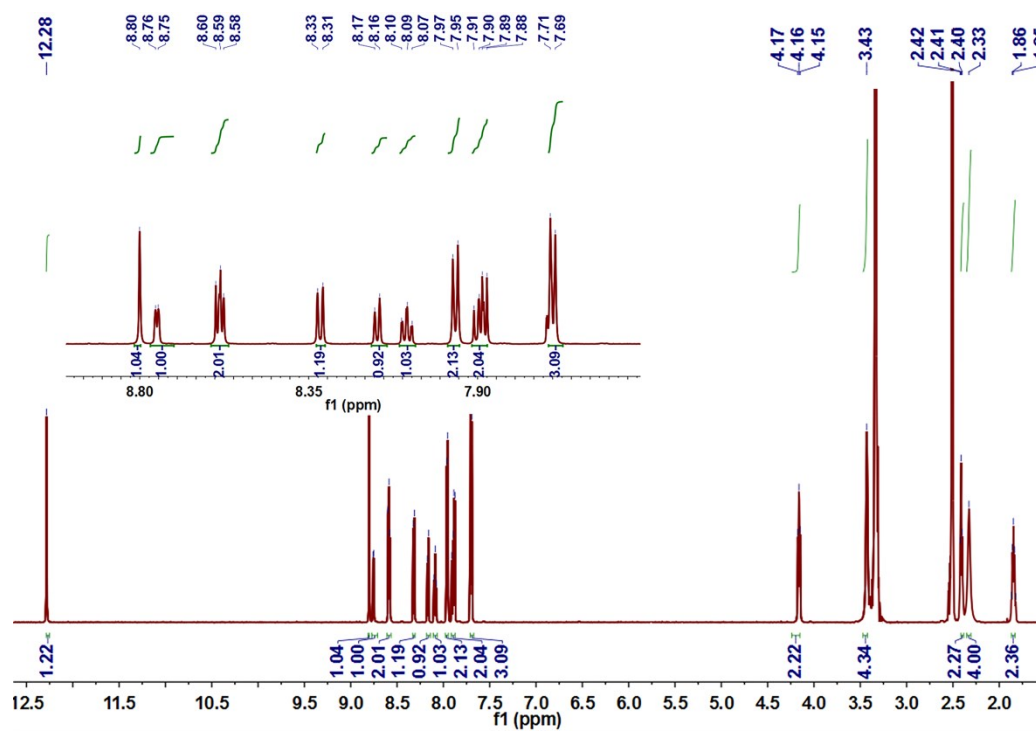

Fig. S8.  $^1\text{H}$  NMR spectrum of CuNI (DMSO- $d_6$ ).

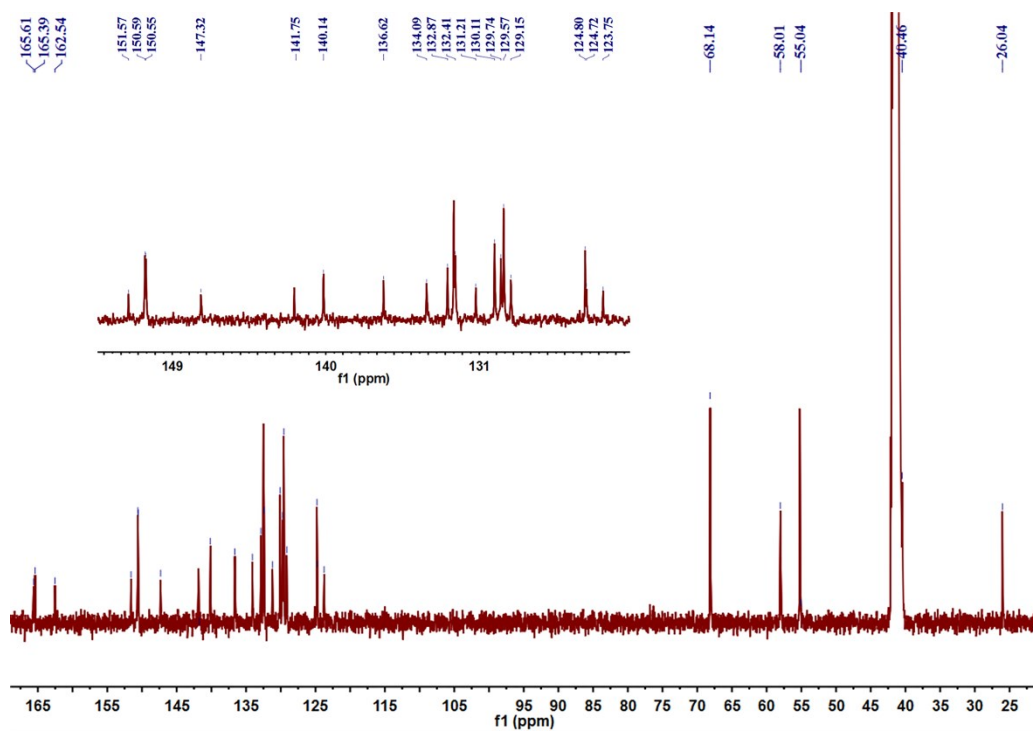

Fig. S9.  $^{13}\text{C}$  NMR spectrum of **CuNI** ( $\text{DMSO-}d_6$ ).

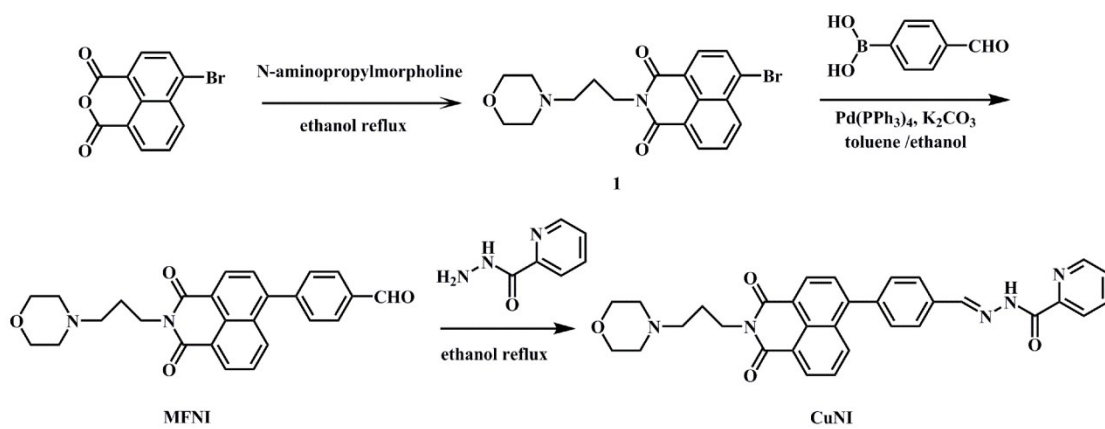

Scheme S1. The synthetic route of **CuNI**.

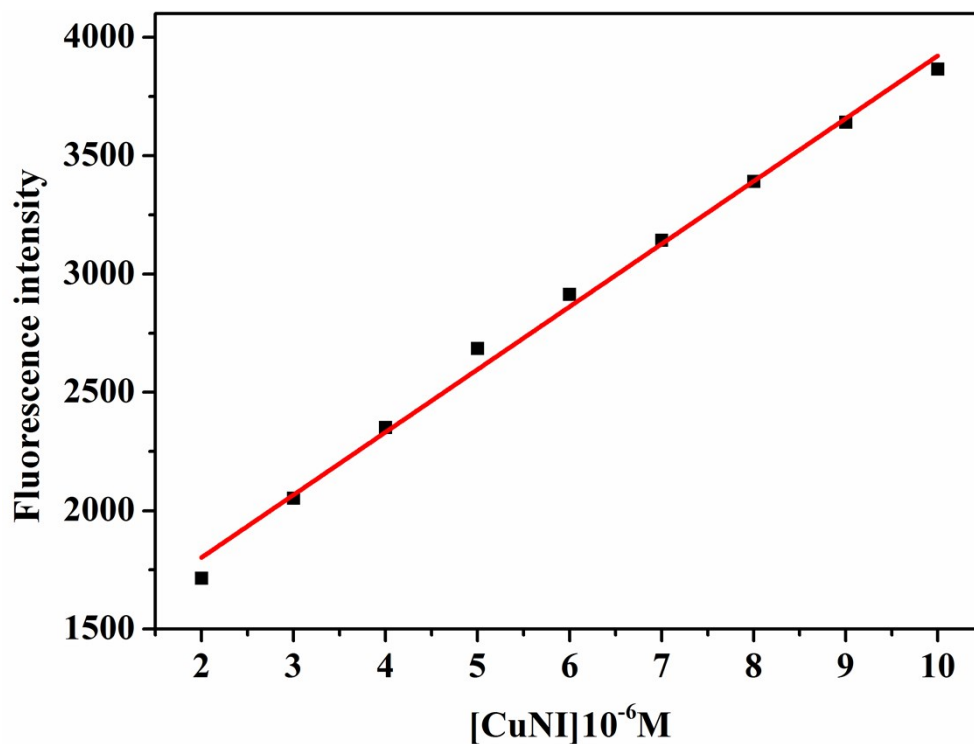

**Fig. S10.** Fluorescence changes of **CuNI** ( $10 \mu\text{M}$ ) upon addition of  $\text{Cu}^{2+}$  (0.2~1 equiv.) in HOAc-NaOAc buffer solution (10 mM, pH 5, with 1% DMSO) at  $25 \text{ }^\circ\text{C}$ . ( $I_{440 \text{ nm}}$ ,  $\lambda_{\text{ex}} = 370 \text{ nm}$ ).

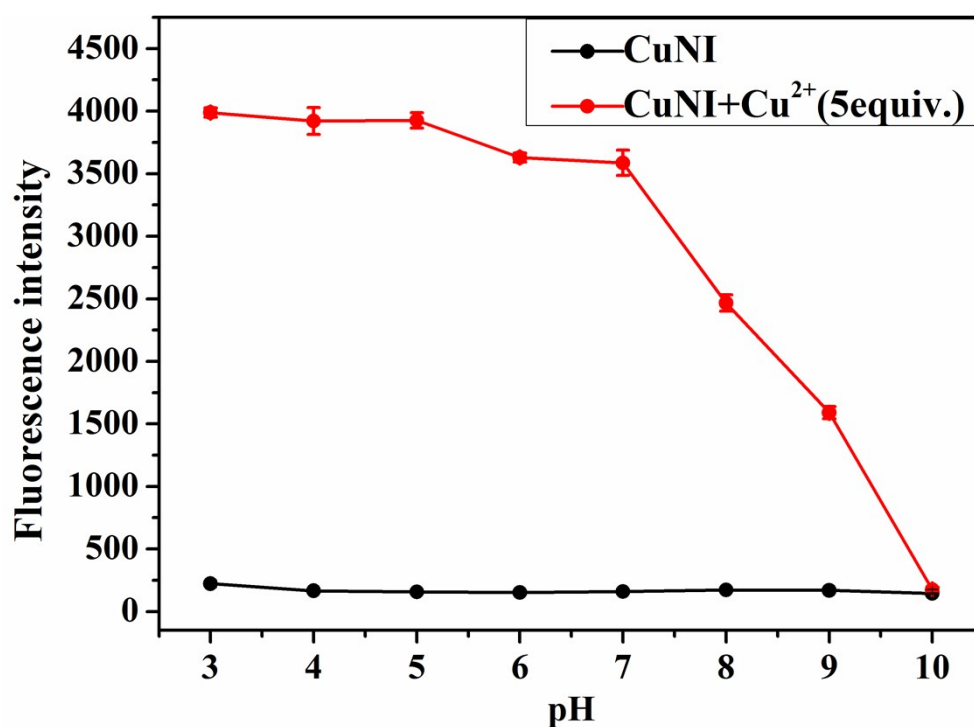

**Fig. S11.** The fluorescence intensity of **CuNI**( $10 \mu\text{M}$ ) and **CuNI** ( $10 \mu\text{M}$ )+  $\text{Cu}^{2+}$  (5equiv.) in pH 3-10 solution at  $25 \text{ }^\circ\text{C}$  ( $I_{440 \text{ nm}}$ ,  $\lambda_{\text{ex}} = 370 \text{ nm}$ ).

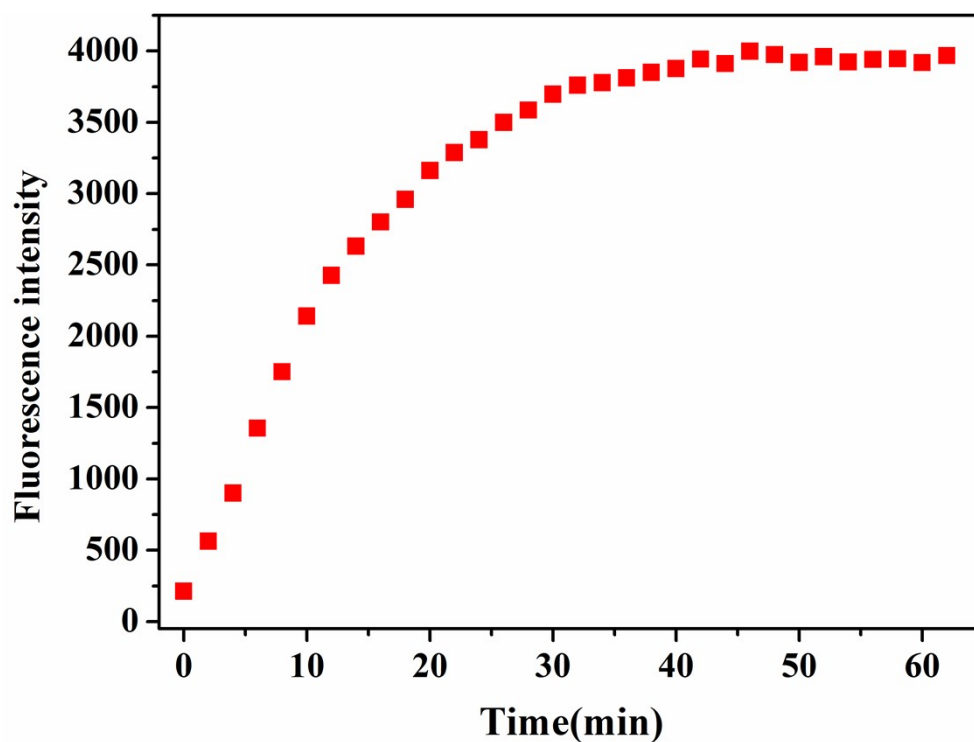

**Fig. S12.** The fluorescence emission intensity of **CuNI** (10 mM)+  $\text{Cu}^{2+}$  (5 equiv.) content in HOAc-NaOAc buffer solution (10 mM, pH 5.0, 1% DMSO) at 25°C.

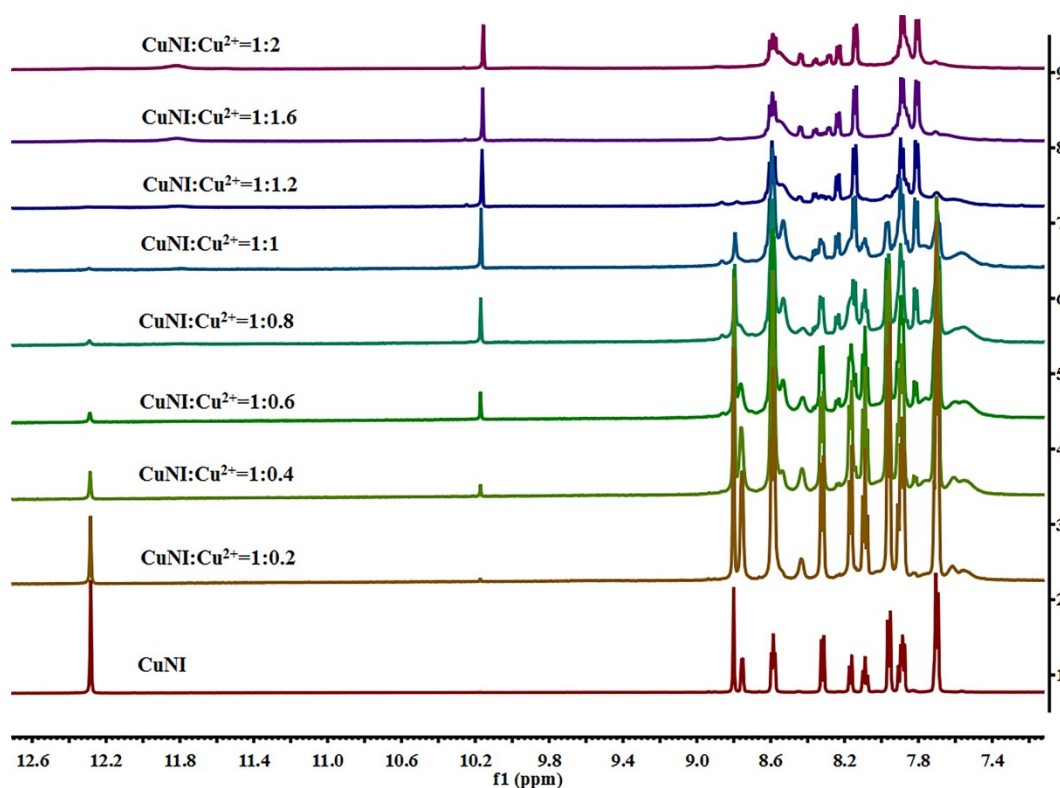

**Fig. S13.**  $^1\text{H}$  NMR spectra of (1) **CuNI** in DMSO- $d_6$ , (2) **CuNI** in DMSO- $d_6$  +  $\text{Cu}^{2+}$  (0.2 equiv.) in  $\text{D}_2\text{O}$ , (3) **CuNI** in DMSO- $d_6$  +  $\text{Cu}^{2+}$  (0.4 equiv.) in  $\text{D}_2\text{O}$ , (4) **CuNI** in DMSO- $d_6$  +  $\text{Cu}^{2+}$  (0.6 equiv.) in  $\text{D}_2\text{O}$ , (5) **CuNI** in DMSO- $d_6$  +  $\text{Cu}^{2+}$  (0.8 equiv.) in

D<sub>2</sub>O, (6) **CuNI** in DMSO-d6 + Cu<sup>2+</sup> (1.0 equiv.) in D<sub>2</sub>O, (7) **CuNI** in DMSO-d6 + Cu<sup>2+</sup> (1.2 equiv.) in D<sub>2</sub>O, (8) **CuNI** in DMSO-d6 + Cu<sup>2+</sup> (1.6 equiv.) in D<sub>2</sub>O, (9) **CuNI** in DMSO-d6 + Cu<sup>2+</sup> (2.0 equiv.) in D<sub>2</sub>O.

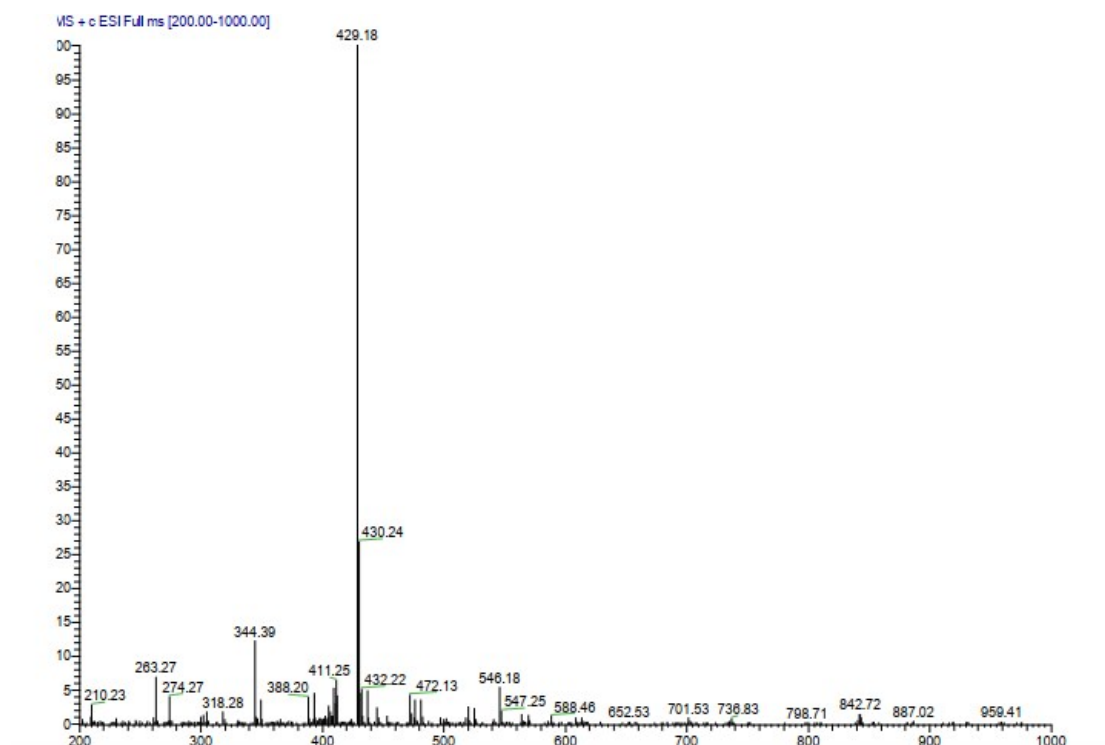

**Fig. S14.** FTMS spectrum of **CuNI** + Cu<sup>2+</sup>.

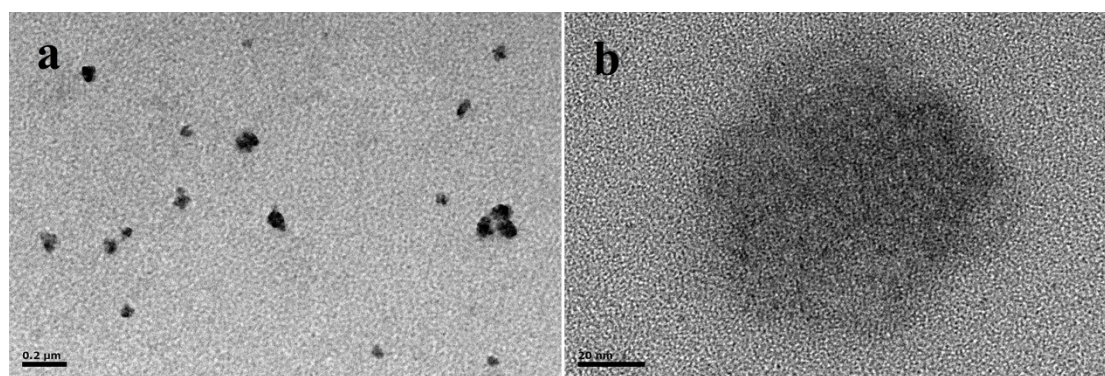

**Fig. S15.** (a) TEM of **CuNI** (10 μM) added with Cu<sup>2+</sup> (5 equiv.) in HOAc-NaOAc buffer solution (10 mM, pH 5.0, with 1% DMSO). (b) Expansion of individual particles



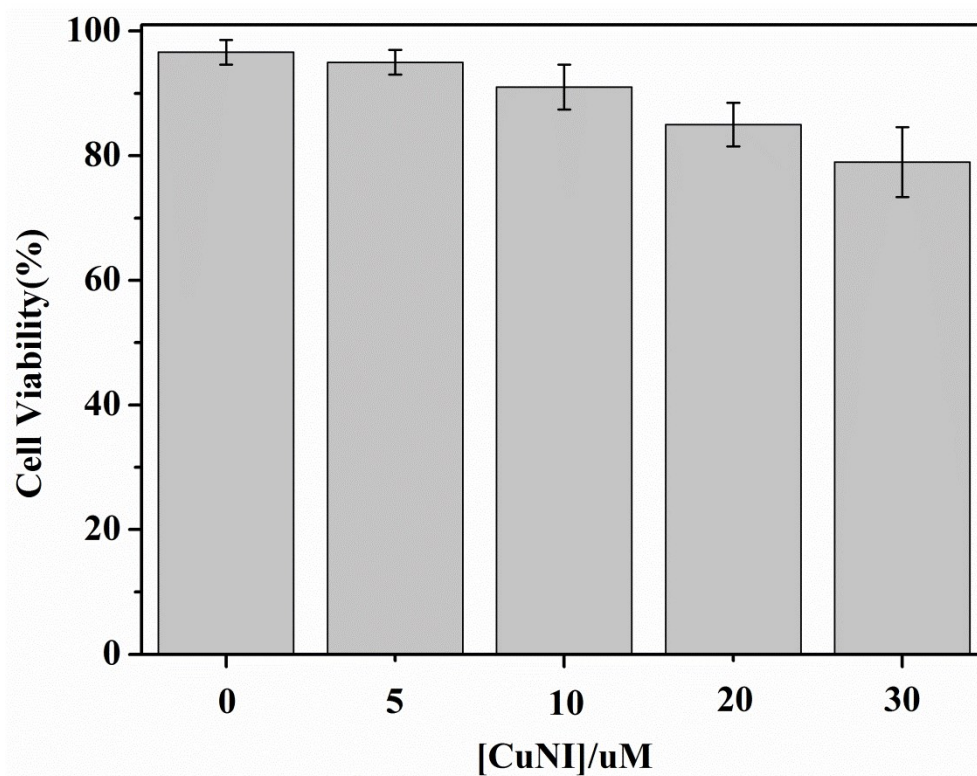

Fig S16. Cytotoxicity data of CuNI (HepG2 cells incubated for 24 h).
